# Supplementary material
Source: PubMed Central journal article supplement (PMC3417328)
Supplement: NIHMS392372-supplement-SD.pdf [file NIHMS392372-supplement-SD.pdf]

# Itk Functions to Control Actin Polymerization at the Immune Synapse through Localized Activation of Cdc42 and WASP

Christine M. Labno, Carol M. Lewis, Daoqi You,  
Daisy W. Leung, Ana Takesono,  
Natalie Kamberos, Abhinav Seth,  
Lisa D. Finkelstein, Michael K. Rosen,  
Pamela L. Schwartzberg, and Janis K. Burkhardt

## Supplemental Experimental Procedures

### Mice

The generation of *Itk*<sup>-/-</sup>, *Rlk*<sup>-/-</sup>, and *Rlk*<sup>-/-</sup> × *Itk*<sup>-/-</sup> mice and their backcrossing to the AND TCR Tg background have been described previously [S1, S2]. AND Tg control mice were obtained from Jackson Laboratory, and C3H mice were from Frederick.

### Antibodies and Reagents

PV1 anti-CD28 antibody was a gift from Dr. Anne Sperling (University of Chicago). Anti-TCRβ (H57) was from BD-Pharmingen. Rhodamine phalloidin, Alexa 488-phalloidin, and rabbit anti-GFP pAb were purchased from Molecular Probes. Rabbit anti-Arp3 antibody was a gift from Dr. Matt Welch (UC Berkeley, Berkeley, CA; [S3]). Rabbit anti-Vav antibody was purchased from BD Biosciences. Mouse anti-WASP monoclonals were developed by immunizing mice with peptides containing WASP residues 248–310 and 461–485 linked with a GGSGGS linker and were screened for conformation-specific reactivity by ELISA. These antibodies will be described in detail elsewhere (D.W.L., C.M. Labno., D.Y., J.K.B., and M.K.R., unpublished data). The GFP-WASP-GBD reagent has been previously described [S4]. All secondary antibodies were obtained from Jackson ImmunoResearch. DASP peptide (residues 86–90; 94–103 of moth cytochrome c) was made by the University of Chicago Peptide Facility.

### Cell Culture

The I-E<sup>b</sup>-positive B cell line CH12 [S5] was cultured in DMEM (GIBCO-BRL) with 10% FCS (BioWhittaker). Lymph node T cells were expanded on irradiated C3H splenocytes pulsed with 30 μg/ml DASP peptide and grown in DMEM with 10% FCS, 45 U/ml IL-2, and 1 μg/ml anti-CD28 in 10% CO<sub>2</sub> at 37°C. At 7–10 days after activation, live T cell blasts were isolated by passage over a Histopaque (Sigma) gradient and were rested at least 1 hr prior to use.

### Analysis of T Cell Conjugates

The FACs-based conjugation assay was done as previously described [S6]. Immunofluorescence microscopy and digital deconvolution were performed as described previously [S4]. For studies of interactions with anti-TCR beads, polystyrene latex microspheres (5.2 μm, Interfacial Dynamics) were coated with 1 μg/ml anti-TCRβ in PBS, washed with 3% BSA/PBS, and resuspended in RPMI/10% FCS at 10<sup>8</sup> beads/ml. Peripheral T cells from spleen were isolated by negative selection on T cell enrichment columns (R&D Systems) and were incubated with an equal number of beads at 4°C for 5 min, then at 37°C for 20 min. The mixture was then fixed with 4% paraformaldehyde and was stained with 10 μg/ml Alexa 594-phalloidin for 40–60 min at room temperature. Cells were washed with 0.5% BSA in PBS, spotted onto slides, and imaged on a Zeiss LSM 510 Confocal microscope. A total of 50–100 bead conjugates per sample were scored for increased F-actin adjacent to the bead.

### Flow Cytometry

Murine T cell blasts were prepared as described above for conjugate experiments, and expression levels of the AND Tg TCR were evaluated by flow cytometry after labeling with FITC-anti-Vα11 (Pharmingen). For analysis of F-actin content, splenic T cells were isolated by negative selection, stimulated for 5 min with anti-CD3-biotin (15 μg/ml) plus streptavidin (8 μg/ml), fixed with 4% paraformaldehyde, and stained with Alexa 488-phalloidin. Cells were analyzed on a

FACsCalibur (Becton Dickinson), and data analyses were performed by using FlowJo (Treestar) or CellQuest (Becton Dickinson) software.

## Supplemental References

- S1. Schaeffer, E.M., Broussard, C., Debnath, J., Anderson, S., McVicar, D.W., and Schwartzberg, P.L. (2000). Tec family kinases modulate thresholds for thymocyte development and selection. *J. Exp. Med.* 192, 987–1000.
- S2. Schaeffer, E.M., Debnath, J., Yap, G., McVicar, D., Liao, X.C., Littman, D.R., Sher, A., Varmus, H.E., Lenardo, M.J., and Schwartzberg, P.L. (1999). Requirement for Tec kinases Rlk and Itk in T cell receptor signaling and immunity. *Science* 284, 638–641.
- S3. Welch, M.D., DePace, A.H., Verma, S., Iwamatsu, A., and Mitchison, T.J. (1997). The human Arp2/3 complex is composed of evolutionarily conserved subunits and is localized to cellular regions of dynamic actin filament assembly. *J. Cell Biol.* 138, 375–384.
- S4. Cannon, J.L., Labno, C.M., Bosco, G., Seth, A., McGavin, M.H., Siminovitch, K.A., Rosen, M.K., and Burkhardt, J.K. (2001). Wasp recruitment to the T cell:APC contact site occurs independently of cdc42 activation. *Immunity* 15, 249–259.
- S5. Bishop, G.A., and Haughton, G. (1985). H-2 control of expression of an idiotype shared by normal B cells and a B-cell lymphoma. *Immunogenetics* 21, 355–366.
- S6. Morgan, M.M., Labno, C.M., Van Seventer, G.A., Denny, M.F., Straus, D.B., and Burkhardt, J.K. (2001). Superantigen-induced T cell:B cell conjugation is mediated by LFA-1 and requires signaling through Lck, but not ZAP-70. *J. Immunol.* 167, 5708–5718.
